# Supplementary material for: Nucleoside-Diphosphate-Kinase of P. gingivalis is Secreted from Epithelial Cells In the Absence of a Leader Sequence Through a Pannexin-1 Interactome
Source: PubMed Central journal article supplement (PMC5121656; doi:10.1038/srep37643), 2016-11-24
Supplement: srep37643-s2.pdf [file srep37643-s2.pdf]

**Nucleoside-Diphosphate-Kinase of *P. gingivalis* is Secreted from Epithelial Cells In the Absence of a Leader Sequence Through a Pannexin-1 Interactome**

**Kalina Atanasova<sup>1</sup>, Jungnam Lee<sup>1</sup>, JoAnn Roberts<sup>2</sup>, Kyulim Lee<sup>1</sup>, David M Ojcius<sup>3</sup> and Özlem Yilmaz<sup>2,4\*</sup>**

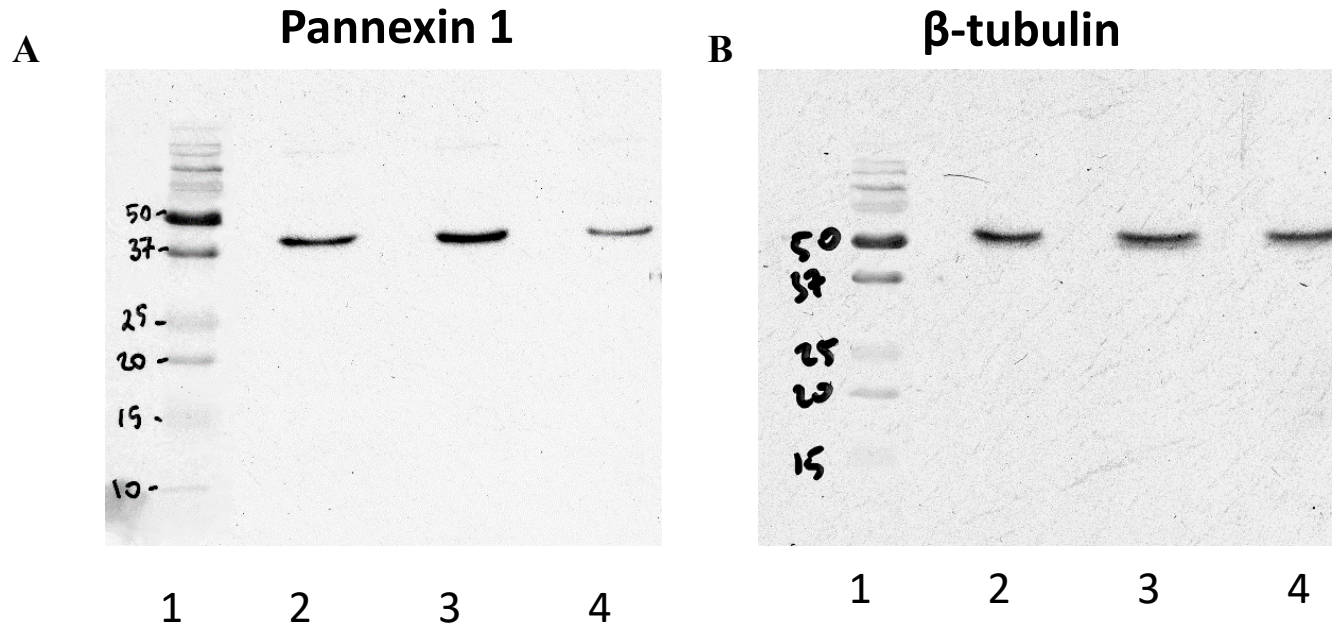

**Supplementary Figure 2.** Full-length Western-blot images of the data presented in the Figure 3A (A).

45kDa Pannexin 1 (PNX1) protein is detected using a PNX1-specific rabbit polyclonal primary antibody (Abcam, catalog #: ab124131) at 1:1000 concentration, and a horseradish peroxidase-linked goat-anti-rabbit secondary antibody (Cell Signaling) at a 1:1000 final concentration. (B) β-tubulin (51kDa) was used as loading control. The same membrane was further stripped and probed with anti-β-tubulin polyclonal mouse antibody (1:1000, catalog #: 322600) (Invitrogen) for loading control, followed by HRP-conjugated secondary antibody (1:1000) (Cell Signaling). Results were visualized using an enhanced chemiluminescence detection kit (Amersham Biosciences). Lane 1 indicates molecular weight marker. Lane 2, 3 and 4 indicate; untransfected (control), Non-target siRNA, and PNX1 siRNA samples respectively.
